# Supplementary material
Source: publisher figshare collection journal article supplement (https://acs.figshare.com/ndownloader/files/23715970)
Supplement: Supplementary file 1 [file 23715970]

## Supporting Information

### Ultra-thin high-quality SnTe nanoplates for fabricating flexible near-infrared photodetectors

Junliang Liu<sup>1</sup>, Xiao Li<sup>1</sup>, Han Wang<sup>1</sup>, Guang Yuan<sup>2,\*</sup>, Alexandra Suvorova<sup>3</sup>, Sarah Gain<sup>3</sup>, Yongling Ren<sup>1</sup>, and Wen Lei<sup>1,\*</sup>

1. Department of Electrical, Electronic and Computer Engineering, The University of Western Australia, 35 Stirling Highway, Crawley, 6009, Australia.
2. College of Information Science and Engineering, Ocean University of China, Qingdao 266100, China
3. Centre for Microscopy, Characterisation and Analysis, The University of Western Australia, 35 Stirling Highway, Crawley, 6009, Australia.

Email: 1\*) [wen.lei@uwa.edu.au](mailto:wen.lei@uwa.edu.au); 2\*) [yuanguang@ouc.edu.cn](mailto:yuanguang@ouc.edu.cn)

---

<sup>1,\*</sup>) Electronic mail: [wen.lei@uwa.edu.au](mailto:wen.lei@uwa.edu.au)

<sup>2,\*</sup>) Electronic mail: [yuanguang@ouc.edu.cn](mailto:yuanguang@ouc.edu.cn)

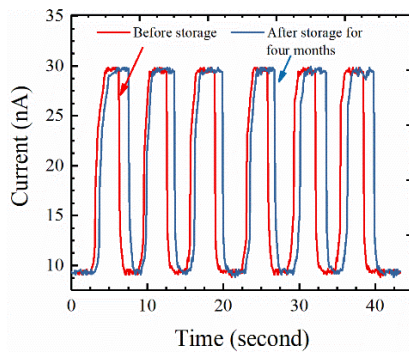

Figure S1. RT photo-switching behavior of the NIR SnTe nanoplate photodetectors before and after storage in air for four months. This photoresponse was measured under the illumination of the 980 nm laser with a laser intensity of 64.5 mW/cm<sup>2</sup>.

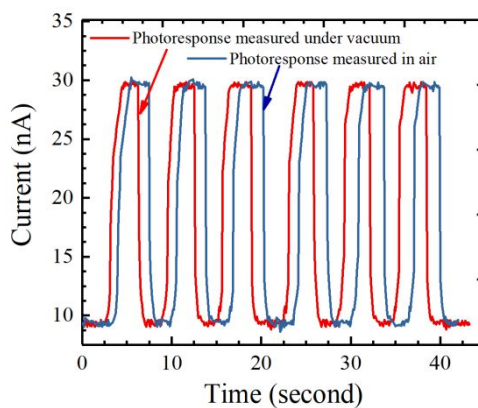

Figure S2. RT photoresponse of the SnTe nanoplate NIR photodetectors measured under vacuum and in air with a bias of 0.5 V and the illumination of a 980 nm laser with a power intensity of 64.5 mW/cm<sup>2</sup>.

Table S1. RT performance summary for the SnTe nanoplate NIR photodetectors measured with five different lasers of the wavelengths of 450 nm, 532 nm, 650 nm, 785 nm, 850 nm and 980 nm.

|        | EQE    | Responsivity | Detectivity                 |
|--------|--------|--------------|-----------------------------|
| 450 nm | 966 %  | 3.5 A/W      | $4.41 \times 10^{10}$ Jones |
| 532 nm | 554 %  | 2.37 A/W     | $3.06 \times 10^{10}$ Jones |
| 650 nm | 177 %  | 1.52 A/W     | $1.96 \times 10^{10}$ Jones |
| 785 nm | 102 %  | 1.12 A/W     | $1.38 \times 10^{10}$ Jones |
| 850 nm | 131 %  | 896 mA/W     | $1.12 \times 10^{10}$ Jones |
| 980 nm | 88.5 % | 698 mA/W     | $8.86 \times 10^9$ Jones    |

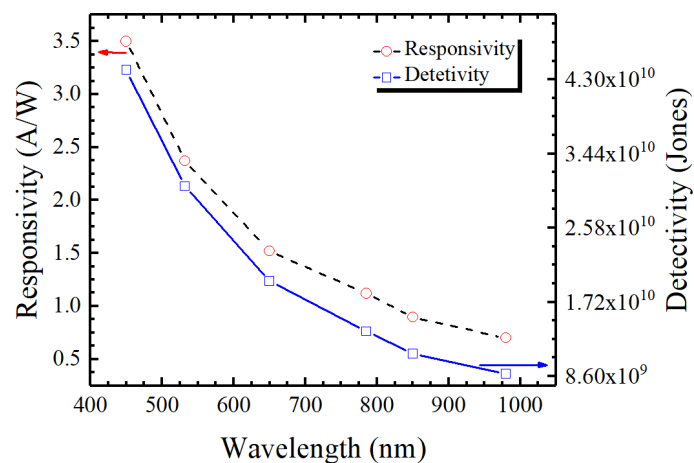

Figure S3. Wavelength-dependent performance of the SnTe nanoplate photodetectors measured at RT including responsivity and detectivity.

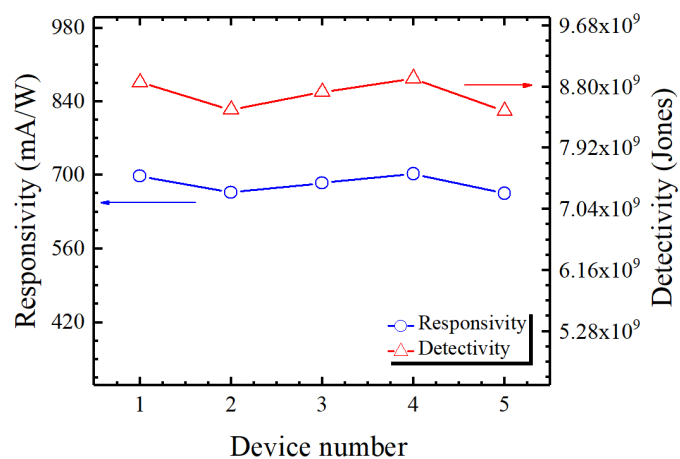

Figure S4. RT performance statistics of five SnTe nanoplate photodetectors fabricated in this work

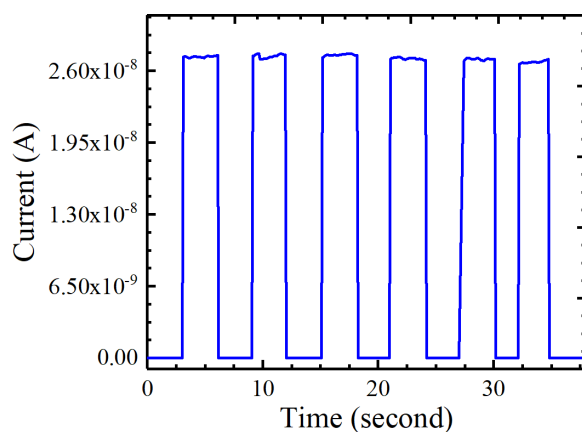

Figure S5. 80 K photoresponse of the SnTe nanoplate photodetector measured under the 980 nm laser illumination with an intensity of 64.5 mW/cm<sup>2</sup>.

Table S2. RT and 80K performance of the SnTe nanoplate photodetector measured under the 980 nm laser illumination with an intensity of 64.5 mW/cm<sup>2</sup>.

|                            | Dark current          | Photocurrent | Responsivity | Detectivity                 |
|----------------------------|-----------------------|--------------|--------------|-----------------------------|
| Room temperature<br>(300K) | 9.3 nA                | 23.7 nA      | 669 mA/W     | $8.50 \times 10^9$ Jones    |
| 80 K                       | $9 \times 10^{-13}$ A | 28 nA        | 904 mA/W     | $1.17 \times 10^{12}$ Jones |

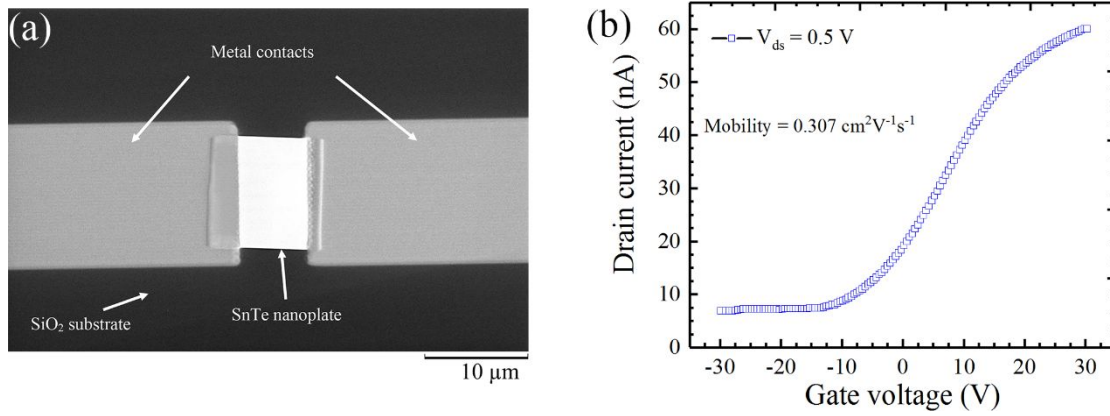

Figure S6 (a) SEM image of a SnTe phototransistor with the shape of a rectangle shape; (b) the corresponding measurement of transfer curve, indicating a mobility of 0.307 cm<sup>2</sup>V<sup>-1</sup>s<sup>-1</sup>.
